# Supplementary material for: Acinetobacter baumannii Bloodstream Infections: A Nationwide Study in Israel
Source: MDPI journal article supplement (doi:10.3390/microorganisms11092178), 2023-08-29
Supplement: s1 [file s1]

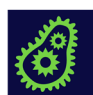

## Supplementary Materials:

**Table S1.** Predictors of 30-day mortality.

|                                                | Alive<br>N=366  | Deceased<br>N=534 | p-Value |
|------------------------------------------------|-----------------|-------------------|---------|
| Patient characteristics                        |                 |                   |         |
| Age, median (IQR) years                        | 68.5 (57-78.25) | 76 (66-85)        | <0.001  |
| Male sex, no. (%)                              | 202 (55.2%)     | 310 (58.1%)       | 0.41    |
| Hospital onset, no. (%)                        | 214 (58.5%)     | 391 (73.2%)       | <0.001  |
| Hospital Size <sup>*</sup> , no./total no. (%) |                 |                   |         |
| <300                                           | 21/214 (9.8%)   | 44/391 (11.3%)    | 0.25    |
| 300-700                                        | 49/214 (22.9%)  | 68/391 (17.4%)    |         |
| >700                                           | 144/214 (67.3%) | 279/391 (71.4%)   |         |
| Ward type <sup>^</sup> , no./total no. (%)     |                 |                   |         |
| ICU                                            | 48/214 (22.4%)  | 56/391 (14.3%)    | 0.002   |
| Medical                                        | 131/214 (61.2%) | 297/391 (76%)     |         |
| Surgical                                       | 28/214 (13.1%)  | 31/391 (7.9%)     |         |
| Other                                          | 7/214 (3.3%)    | 7/391 (1.8%)      |         |
| Day of onset, median (IQR) <sup>^</sup> days   | 17 (10-32.25)   | 16 (9-28)         | 0.19    |
| Polymicrobial event, no. (%)                   | 74 (20.2%)      | 106 (19.9%)       | 0.93    |
| Antibiotic susceptibility, no./total no. (%)   |                 |                   |         |
| AG                                             | 156/359 (42.6%) | 74/532 (13.9%)    | <0.001  |
| Carb                                           | 148/359 (40.4%) | 59/533 (11%)      | <0.001  |
| xCS                                            | 94/359 (25.7%)  | 38/531 (7.1%)     | <0.001  |
| FQ                                             | 128/358 (35%)   | 36/531 (6.7%)     | <0.001  |
| Sul                                            | 150/331 (41%)   | 94/505 (17.6%)    | <0.001  |
| BLBLI                                          | 112/357 (30.6%) | 43/530 (8.1%)     | <0.001  |
| Fol                                            | 137/318 (37.4%) | 119/513 (22.3%)   | <0.001  |
| MDR                                            | 232/359 (63.4%) | 493/533 (92.3%)   | <0.001  |
| XDR                                            | 214/359 (58.5%) | 478/533 (89.5%)   | <0.001  |
| PDR                                            | 139/359 (38%)   | 339/533 (63.5%)   | <0.001  |

IQR- interquartile rage; ICU- intensive care unit; AG—aminoglycosides (amikacin, gentamicin, tobramycin); Carb—carbapenems (imipenem, meropenem); xCS—extended-spectrum cephalosporins (cefotaxime, ceftriaxone, ceftazidime, cefepime); FQ—fluoroquinolones (ciprofloxacin, ofloxacin, levofloxacin); Sul—ampicillin-sulbactam; BLBLI—antipseudomonal penicillins +  $\beta$ -lactamase inhibitors (piperacillin-tazobactam, ticarcillin-clavulanate); Fol—folate pathway inhibitors (trimethoprim-sulphamethoxazole); MDR—multidrug-resistant; XDR—extensively drug-resistant; PDR—pandrug-resistant.

\* Number of acute-care hospital beds

<sup>^</sup> Hospital onset events only
